# Supplementary material
Source: PubMed Central journal article supplement (PMC6085138)

## Figures and captions

### Figure 1: 50% Negative Predictive Values for OFC to Tree Nut Among Tree Nut Allergic and Sensitized Individuals

Caption: 50% negative predictive values for the combined allergic and sensitized population, adjusted for patient age, eczema, asthma, gender, and peanut allergy. Left panel displays wheal size curve, and right panel tree nut sIgE curve.

### Figure 2: 50% Negative Predictive Values for OFC to Tree Nut Among Tree Nut Sensitized Individuals

Caption: 50% negative predictive values for the tree nut sensitized population, adjusted for patient age, eczema, and peanut allergy. Left panel displays wheal size curve, and right panel tree nut sIgE curve. Reflects relationship with sensitized tree nuts in individuals with no history of tree nut allergy.

### Figure 3: 50% Negative Predictive Values for OFC to Tree Nut Among Tree Nut Allergic Individuals

Caption: 50% negative predictive values for the tree nut sensitized population, adjusted for patient age, eczema, and peanut allergy. Left panel displays wheal size curve, and right panel tree nut sIgE curve. Reflects relationship with sensitized tree nuts other than the nut to which the patient has a primary allergy.

### Supplemental Figure 1: 50% Negative Predictive Values for OFC to Tree Nut Among Tree Nut Allergic and Sensitized Individuals

Caption: 50% negative predictive values for the combined allergic and sensitized population. Walnut is adjusted for peanut allergy. Hazelnut, and pecan individual curves are unadjusted due to power issues. Combined cashew/pistachio and walnut/pecan/hazelnut curves are age adjusted.

**Supplemental Table 1. Characteristics of tree nut oral food challenges near time of OFC in tree nut allergic individuals by presenting symptoms**

|                               | No. | Pass rate | OFC with sIgE <2 kUA/L, no. (%) | OFC with sIgE ≥2 kUA/L, no. (%) | OFC with SPT <3 mm, no. (%) | OFC with SPT ≥3 mm, no. (%) |
|-------------------------------|-----|-----------|---------------------------------|---------------------------------|-----------------------------|-----------------------------|
| <b>Anaphylaxis</b>            | 21  | 71%       | 17 (81)                         | 3 (14)                          | 11 (52)                     | 8 (38)                      |
| <b>Skin symptoms</b>          | 46  | 83%       | 41 (89)                         | 1 (2)                           | 33 (72)                     | 13 (28)                     |
| <b>Facial swelling</b>        | 18  | 56%       | 16 (89)                         | 2 (11)                          | 8 (44)                      | 8 (44)                      |
| <b>Oropharyngeal symptoms</b> | 15  | 73%       | 12 (80)                         | 2 (13)                          | 10 (67)                     | 5 (33)                      |
| <b>Respiratory symptoms</b>   | 15  | 67%       | 14 (93)                         | 1 (7)                           | 8 (53)                      | 6 (40)                      |
| <b>Vomiting</b>               | 18  | 83%       | 17 (94)                         | 1 (6)                           | 10 (56)                     | 7 (39)                      |

**TN=tree nut; OFC=oral food challenge; sIgE=specific IgE; SPT=skin prick test. Skin symptoms: hives, itching, flushing, rash. Oropharyngeal symptoms: tongue or throat pruritus/swelling. Respiratory symptoms: cough, wheezing, shortness of breath. 93% of tree nut challenges in tree nut allergic individuals had both sIgE and SPT performed, 6% had SPT performed only, and 1% had sIgE performed only.**

**Supplemental Table 1.2: Testing characteristics at time of initial diagnosis for tree nut OFCs in tree nut allergic individuals by presenting symptoms**

|                               | No. | sIgE <2 kUA/L, no. (%) | sIgE ≥2 kUA/L, no. (%) | SPT <3 mm, no. (%) | SPT ≥3 mm, no. (%) |
|-------------------------------|-----|------------------------|------------------------|--------------------|--------------------|
| <b>Anaphylaxis</b>            | 21  | 17 (81)                | 3 (14)                 | 8 (38)             | 11 (52)            |
| <b>Skin symptoms</b>          | 46  | 40 (87)                | 2 (4)                  | 23 (50)            | 23 (50)            |
| <b>Facial swelling</b>        | 18  | 16 (89)                | 2 (13)                 | 6 (33)             | 10 (56)            |
| <b>Oropharyngeal symptoms</b> | 15  | 12 (80)                | 2 (13)                 | 7 (47)             | 8 (53)             |
| <b>Respiratory symptoms</b>   | 15  | 14 (93)                | 1 (7)                  | 5 (33)             | 9 (60)             |
| <b>Vomiting</b>               | 18  | 16 (89)                | 2 (11)                 | 9 (50)             | 8 (44)             |

**OFC=oral food challenge; sIgE=specific IgE; SPT=skin prick test. Skin symptoms: hives, itching, flushing, rash. Oropharyngeal symptoms: tongue or throat pruritus/swelling. Respiratory symptoms: cough, wheezing, shortness of breath. 93% of tree nut challenges in tree nut allergic individuals had both sIgE and SPT performed, 6% had SPT performed only, and 1% had sIgE performed only.**

**Supplemental Table 1.3: Testing characteristics at time of initial diagnosis in tree nut allergic individuals by presenting symptoms**

|                               | No. | sIgE <2 kUA/L, no. (%) | sIgE ≥2 kUA/L, no. (%) | SPT <3 mm, no. (%) | SPT ≥3 mm, no. (%) |
|-------------------------------|-----|------------------------|------------------------|--------------------|--------------------|
| <b>Anaphylaxis</b>            | 15  | 12 (80)                | 3 (20)                 | 7 (47)             | 7 (47)             |
| <b>Skin symptoms</b>          | 36  | 31 (86)                | 2 (6)                  | 19 (53)            | 17 (47)            |
| <b>Facial swelling</b>        | 16  | 15 (94)                | 2 (13)                 | 5 (19)             | 10 (63)            |
| <b>Oropharyngeal symptoms</b> | 13  | 10 (77)                | 2 (15)                 | 7 (54)             | 6 (46)             |
| <b>Respiratory symptoms</b>   | 11  | 10 (91)                | 1 (9)                  | 5 (45)             | 5 (45)             |
| <b>Vomiting</b>               | 13  | 12 (92)                | 2 (15)                 | 7 (54)             | 6 (46)             |

**OFC=oral food challenge; sIgE=specific IgE; SPT=skin prick test. Skin symptoms: hives, itching, flushing, rash. Oropharyngeal symptoms: tongue or throat pruritus/swelling. Respiratory symptoms: cough, wheezing, shortness of breath. 93% of tree nut challenges in tree nut allergic individuals had both sIgE and SPT performed, 6% had SPT performed only, and 1% had sIgE performed only.**

Supplemental Table 2. Characteristics of failed tree nut oral food challenges

|                                       | No. | OFC with sIgE<br><2 kUA/L, no. (%) | OFC with sIgE<br>≥2 kUA/L, no. (%) | OFC with SPT<br><3 mm, no. (%) | OFC with SPT<br>≥3 mm, no. (%) |
|---------------------------------------|-----|------------------------------------|------------------------------------|--------------------------------|--------------------------------|
| <b>All failed Tree nut challenges</b> | 22  | 14 (64)                            | 5 (23)                             | 4 (18)                         | 16 (73)                        |
| <b>Tree nut allergic</b>              | 16  | 12 (75)                            | 2 (13)                             | 3 (19)                         | 11 (69)                        |
| <b>Tree nut sensitized</b>            | 6   | 2 (33)                             | 3 (50)                             | 1 (17)                         | 5 (83)                         |
| <b>Almond</b>                         | 0   | -                                  | -                                  | -                              | -                              |
| <b>Cashew</b>                         | 6   | 6 (100)                            | 0 (0)                              | 0 (0)                          | 6 (100)                        |
| <b>Walnut</b>                         | 5   | 2 (40)                             | 2 (40)                             | 0 (0)                          | 5 (100)                        |
| <b>Hazelnut</b>                       | 3   | 1 (33)                             | 1 (33)                             | 0 (0)                          | 2 (67)                         |
| <b>Pecan</b>                          | 3   | 1 (33)                             | 1 (33)                             | 1 (33)                         | 2 (67)                         |
| <b>Pistachio</b>                      | 4   | 3 (75)                             | 1 (25)                             | 1 (25)                         | 2 (50)                         |
| <b>Brazil nut</b>                     | 1   | 1 (100)                            | 0 (0)                              | 0 (0)                          | 1 (100)                        |

sIgE=specific IgE; SPT=skin prick test.  
**77% of failed tree nut OFCs had both sIgE and SPT performed, 14% had SPT only, and 9% had sIgE only.**

Supplemental Table 3. Tree nut oral food challenge characteristics in peanut allergic patients with tree nut co-sensitization

|                                                    | No. | Pass rate | OFC with sIgE<br><2 kUA/L, no. (%) | OFC with sIgE<br>≥2 kUA/L, no. (%) | OFC with SPT<br><3 mm, no. (%) | OFC with SPT<br>≥3 mm, no. (%) |
|----------------------------------------------------|-----|-----------|------------------------------------|------------------------------------|--------------------------------|--------------------------------|
| <b>Tree nut OFCs in peanut allergic patients</b>   | 68  | 96%       | 51 (75)                            | 8 (12)                             | 49 (72)                        | 8 (12)                         |
| <b>Tree nut allergic</b>                           | 9   | 89%       | 9 (100)                            | 0 (0)                              | 6 (67)                         | 2 (22)                         |
| <b>Tree nut sensitized</b>                         | 44  | 95%       | 31 (70)                            | 8 (18)                             | 34 (77)                        | 6 (14)                         |
| <b>Tree Nut avoidance despite negative testing</b> | 15  | 100%      | 11 (73)                            | -                                  | 9 (60)                         | -                              |
| <b>Almond</b>                                      | 36  | 100%      | 21 (58)                            | 4 (11)                             | 24 (67)                        | 6 (17)                         |
| <b>Cashew</b>                                      | 5   | 100%      | 5 (100)                            | 0 (0)                              | 3 (60)                         | 1 (20)                         |
| <b>Walnut</b>                                      | 10  | 90%       | 8 (80)                             | 0 (0)                              | 8 (80)                         | 1 (10)                         |
| <b>Hazelnut</b>                                    | 11  | 91%       | 7 (64)                             | 4 (36)                             | 9 (82)                         | 0 (0)                          |
| <b>Pecan</b>                                       | 4   | 100%      | 3 (75)                             | 0 (0)                              | 4 (100)                        | 0 (0)                          |
| <b>Pistachio</b>                                   | 2   | 50%       | 2 (100)                            | 0 (0)                              | 1 (50)                         | 0 (0)                          |

# Supplemental Figure 1:

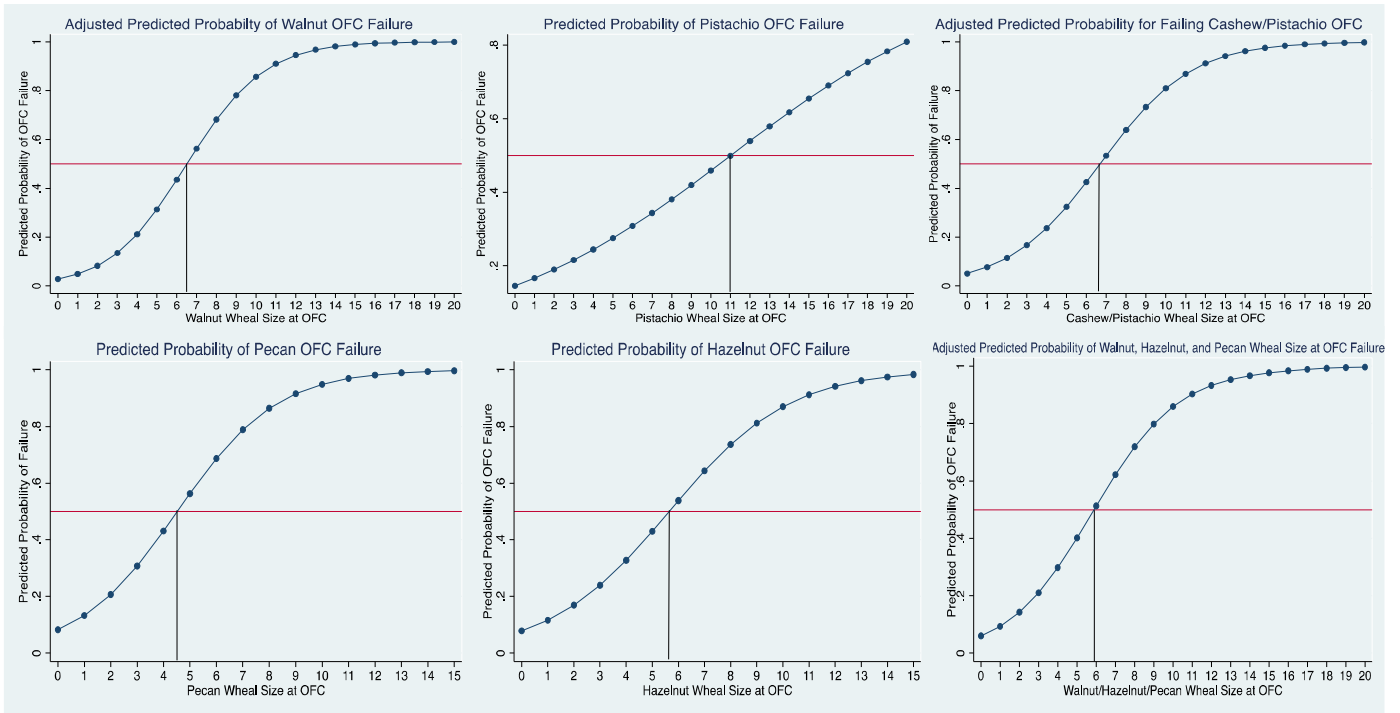

Supplement: NIHMS862456-supplement-supplement_1.pdf [file NIHMS862456-supplement-supplement_1.pdf]
